# Supplementary material for: Toxoplasma gondii seropositivity and cognitive functioning in older adults: an analysis of cross-sectional data of the National Health and Nutrition Examination Survey 2011–2014
Source: HighWire-hosted journal article supplement (doi:10.1136/bmjopen-2022-071513), 2024-03-01
Supplement: bmjopen-2022-071513supp001_data_supplement.pdf [file bmjopen-2022-071513supp001_data_supplement.pdf]

## Appendix. The characteristics of included and excluded participants due to missing data

| Variable                       | Excluded<br>(n=516) | Included<br>(n=2956) | <i>P</i> Value   |
|--------------------------------|---------------------|----------------------|------------------|
| Age, years                     | 69.6(7.0)           | 70.0(7.0)            | 0.173            |
| Sex, n (%)                     |                     |                      | 0.436            |
| Male                           | 243(47.1%)          | 1447(49.0%)          |                  |
| Female                         | 273(52.9%)          | 1509(51.0%)          |                  |
| Race/ethnicity, n (%)          |                     |                      | <b>&lt;0.001</b> |
| Mexican Americans              | 47(9.1%)            | 274(9.3%)            |                  |
| Other Hispanics                | 55(10.7%)           | 292(9.9%)            |                  |
| Non-Hispanic Whites            | 152(29.5%)          | 1428(48.3%)          |                  |
| Non-Hispanic Blacks            | 196(38.0%)          | 644(21.8%)           |                  |
| Other                          | 66(12.8%)           | 318(10.8%)           |                  |
| Education, n (%)               |                     |                      | <b>&lt;0.001</b> |
| Below high school              | 170(33.0%)          | 850(28.7%)           |                  |
| High school graduate           | 123(23.8%)          | 421(14.2)            |                  |
| Some college or above          | 219(42.4%)          | 1428(48.3%)          |                  |
| Depressive symptoms            | 3.1(4.2)            | 3.5(4.8)             | 0.136            |
| Smoking, n (%)                 |                     |                      | 0.578            |
| Never                          | 265(51.4%)          | 1472(49.8%)          |                  |
| Former                         | 189(36.6%)          | 1095(37.0%)          |                  |
| Current                        | 59(11.4%)           | 385(13.0%)           |                  |
| Body mass index, n (%)         |                     |                      | <b>0.001</b>     |
| <18.5 kg/m <sup>2</sup>        | 16(3.1%)            | 44(1.5%)             |                  |
| 18.5-24.9 kg/m <sup>2</sup>    | 134(26.0%)          | 758(25.6%)           |                  |
| 25.0-29.9 kg/m <sup>2</sup>    | 142(27.5%)          | 1046(35.4%)          |                  |
| ≥30 kg/m <sup>2</sup>          | 202(39.1%)          | 1051(35.6%)          |                  |
| Physical activity, hours/week  | 8.1(10.0)           | 8.7(10.7)            | 0.558            |
| Total cholesterol, mg/dL       | 192.5(45.9)         | 190.2(42.7)          | 0.385            |
| Systolic blood pressure, mmHg  | 136.3(21.7)         | 133.5(27.0)          | <b>0.032</b>     |
| Digit Symbol Substitution Test | 43.1(17.1)          | 45.8(17.5)           | <b>0.004</b>     |
| CERAD W-L delayed recall       | 5.6(2.5)            | 5.8(2.4)             | 0.093            |
| CERAD W-L immediate recall     | 18.2(5.3)           | 18.5(5.0)            | 0.300            |
| Animal Fluency Test            | 15.8(5.5)           | 16.4(5.6)            | <b>0.030</b>     |
